# Supplementary material for: Efficient Carrier Recombination in InGaN Pyramidal µ-LEDs Obtained through Selective Area Growth
Source: MDPI journal article supplement (doi:10.3390/photonics8050157), 2021-05-10
Supplement: s1 [file s1]

# Supporting information for

## Efficient carrier recombination in InGaN pyramidal $\mu$ -LED obtained by selective area growth

Jie'an Jiang<sup>1,2,3</sup>, Houqiang Xu<sup>2,3</sup>, Li Chen<sup>2,3</sup>, Long Yan<sup>4</sup>, Jason Hoo<sup>4</sup>, Shiping Guo<sup>4</sup>, Yuheng Zeng<sup>2,3</sup>, Wei Guo<sup>2,3\*</sup>, and Jichun Ye<sup>2,3\*</sup>

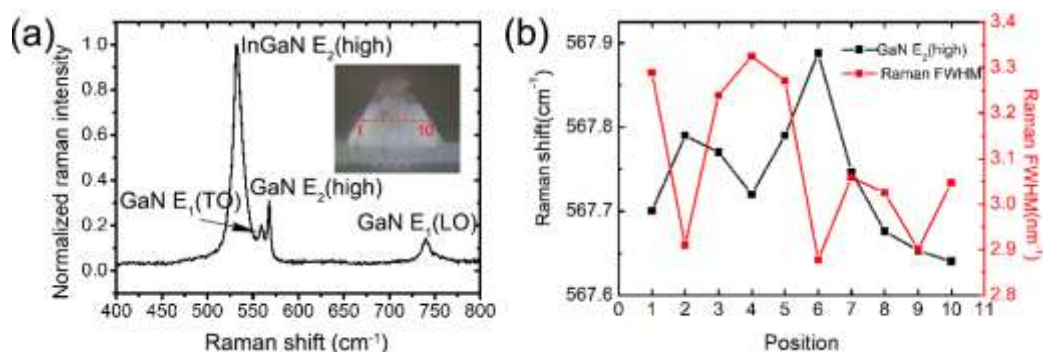

Supplementary Figure S1. Raman spectrum taken from the cross-sectional GaN pyramid (a), the inserted image shows the optical image of the GaN pyramid and positions where Raman spectroscopy was taken; The Raman shift and corresponding FWHM values of the GaN E<sub>2</sub> (high) peak from above 10 positions on the pyramid

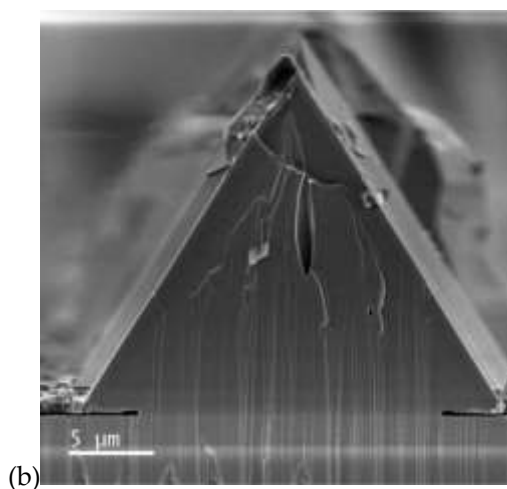

Supplementary Figure S2. Cross-sectional SEM image of the pyramidal GaN overgrowing on SiO<sub>2</sub> mask (chemically etched away)

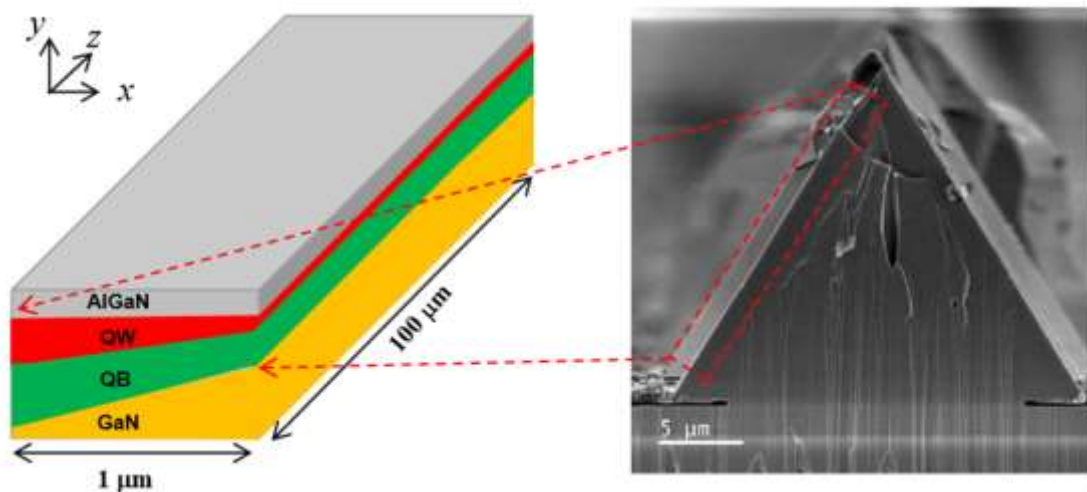

Supplementary Figure S3. The correlation between the simulation structure and the SEM cross-sectional image of the pyramid
