# Supplementary material for: Efficient Carrier Recombination in InGaN Pyramidal µ-LEDs Obtained through Selective Area Growth
Source: MDPI journal article supplement (doi:10.3390/photonics8050157), 2021-05-10
Supplement: s1 [file s1]

Archive with 1 entries (1 files):
- photonics-1167216-r1-supplementary.pdf
